# Supplementary material
Source: ML conference proceedings conference paper supplement (https://openreview.net/forum?id=dqBkZ9rmSF)
Supplement: supplementary_material [file Appendix.pdf › Appendix.pdf]

## A Related Work

Table 1: Comparison of Diffusion-based Recommenders

|                   | <i>Modeling Target</i> | <i>Forward Perturbation</i> | <i>Negative Sampling</i> | <i>Representative Work</i> |
|-------------------|------------------------|-----------------------------|--------------------------|----------------------------|
| <b>Continuous</b> | Score Function         | Gaussian on Embedding       | ✗                        | DreamRec [1]               |
|                   | Score Function         | Gaussian on Embedding       | ✓                        | PreferDiff [2]             |
|                   | Preference Scores      | Gaussian on One-hot         | ✓                        | DiffRec [3]                |
| <b>Discrete</b>   | Preference Scores      | Bernoulli on One-hot        | ✓                        | RecFusion [4]              |
|                   | Preference Scores      | Categorical on One-hot      | ✓                        | DDSR [5]                   |
|                   | Preference Ratios      | Fading on Items             | ✓                        | <b>PreferGrow</b> (Ours)   |

**Diffusion-based recommenders** [1, 6–22, 2, 3, 23–28, 5, 29, 30] utilize forward perturbation in diffusion models to address data sparsity [31], thereby better adapting to sparse recommendation scenarios. They typically consist of three core components: the modeling objective, the forward noise addition, and the corresponding backward generation process, which are summarized in Table 1. Current research on diffusion-based recommenders can be classified into two primary approaches: one involves adding noise to dense item embeddings at the item level, and the other focuses on perturbing the one-hot interaction probability vector for all items, which is referred to as preference scores. The first research line, pioneered by DreamRec [1] and DiffuRec [6], encodes user-preferred items as dense embeddings and adds Gaussian noise to these item embeddings. DreamRec [1] models the score functions (the gradient of the log-likelihood of the perturbed distribution) without negative sampling, whereas DiffuRec [6] incorporates a recommendation loss that includes negative sampling. Building on them, PreferDiff [2] introduced an optimization objective derived from BPR loss [32], which integrates multiple negative samples into the generative modeling framework. However, the application of continuous Gaussian noise to positive preferred items, in contrast to the discrete nature of negative samples, creates an inherent mismatch, making it difficult to optimize both simultaneously during training, leading to a trade-off [6, 33, 2]. [21] Additionally, other works have introduced more sophisticated module designs [7, 8, 10, 12–14, 16, 19, 21, 22] or applied them to different recommendation tasks [9–18, 20]. For instance, DimeRec [33] incorporates multi-interest models, DiQDiff [19] introduces semantic vector quantization, and DiffuASR [9] applies item-level diffusion to sequential recommendation data augmentation. The second research line [3, 23–28, 5, 29, 30] involves converting user preference data into one-hot vectors, which are then mapped to preference scores within the probability simplex. DiffRec [3] add continuous Gaussian noise to the preference scores, and then learn to recover the clean preference scores from the perturbed ones. Consecutively, LD4MRec [24] refines the design for efficient multimedia recommendation, and D3Rec [28] introduces targeted category preferences to control diversity during inference. However, the constraints of the probability simplex—non-negativity and normalization—pose significant challenges in accurately estimating the preference scores [34]. To address these challenges while considering the probability simplex constraints, RecFusion [4] assumes a Bernoulli noise prior, completing the binomial diffusion process and subsequently modeling the parameters of the reverse binomial distribution to facilitate the reverse generation of preference scores. On the other hand, DDSR [5] adopts a categorical noise prior, as proposed in [35], and directly recovers clean preference scores from the perturbed ones. Nonetheless, the constraints of the probability simplex may limit the effectiveness of preference score modeling. Moreover, both diffusion-based recommenders rely on prior noise assumptions, such as Gaussian [1] or Bernoulli noise [23], which may not be optimal for recommendation scenarios where user preference data is inherently discrete.

**Discrete Diffusion Models** [35–38, 34, 39, 40] have made substantial advances recently. Initially, D3PM [35] proposed a discrete diffusion framework based on an arbitrary probability transition matrix, trained with the evidence lower bound of the log-likelihood. Subsequently, LDR [36] extended this framework to a continuous-time setting using the Kolmogorov forward and backward equations. However, modeling score functions in such models presents challenges, as the gradient of the data distribution is undefined. To address this, CSM [37] introduced Concrete Score—discretization of score functions and the ratios of data distributions—as modeling objectives for discrete diffusion

models. Building upon these advances, SEDD [34] further bridges discrete diffusion models and ConcreteScore by introducing the score entropy loss. Expanding on these developments, we present PreferGrow, a matrix-based discrete diffusion framework which perturbing data by retaining or replacing items within a discrete corpus. The idempotent property of the replacement matrix (or fading matrix) is central to PreferGrow, and we demonstrate that it satisfies the Kolmogorov forward and backward equations as LDR [36], aligning it with prior works. Additionally, we introduce a design paradigm for the idempotent replacement matrix, which unifies previous approaches, including absorbing and uniform settings.

## B Proofs of Main Results

*Proof of Theorem ??:*  $\alpha_t : [0, T] \rightarrow [0, 1]$  is a strictly decreasing function with  $\alpha_0 = 1$  and  $\alpha_T = 0$  and the preference fading discrete diffusion process is denoted as  $\mathbf{P}_{t|0} = \alpha_t \mathbf{I} + (1 - \alpha_t) \mathbf{E}$ ,  $\forall t \in [0, T]$ . Then we can rewrite preference fading discrete diffusion process as for  $\alpha_0 = 1$ :

$$\mathbf{P}_{t|0} = \frac{\alpha_t}{\alpha_0} \mathbf{I} + \left(1 - \frac{\alpha_t}{\alpha_0}\right) \mathbf{E}, \forall t \in [0, T]. \quad (1)$$

For any well-defined  $\mathbf{P}_{t|s,0}$  with  $0 < s < t$ , the following limiting distribution constraint must hold:

$$p_{t|0}(x_t|x_0) = \sum_{x_s \in \mathcal{X}} p_{t|s,0}(x_t|x_s, x_0) p_{s|0}(x_s|x_0), \forall x_t, x_0 \in \mathcal{X}. \quad (2)$$

In matrix form, this constraint reduces to  $\mathbf{P}_{t|0} = \mathbf{P}_{t|s,0} \mathbf{P}_{s|0}$  for all  $0 < s < t$ . Note that one possible particular solution of this equation is:

$$\mathbf{P}_{t|s,0} := \mathbf{P}_{t|s} = \frac{\alpha_t}{\alpha_s} \mathbf{I} + \left(1 - \frac{\alpha_t}{\alpha_s}\right) \mathbf{E}, \forall 0 \leq s \leq t \leq T. \quad (3)$$

We will show that this indeed satisfies the constraint under the condition that  $\mathbf{E}$  is idempotent.

$$\begin{aligned} \mathbf{P}_{t|s} \mathbf{P}_{s|0} &= \left[ \frac{\alpha_t}{\alpha_s} \mathbf{I} + \left(1 - \frac{\alpha_t}{\alpha_s}\right) \mathbf{E} \right] \cdot \left[ \frac{\alpha_s}{\alpha_0} \mathbf{I} + \left(1 - \frac{\alpha_s}{\alpha_0}\right) \mathbf{E} \right] \\ &= \frac{\alpha_t}{\alpha_0} \mathbf{I} + \left( \frac{\alpha_t}{\alpha_s} - 2 \frac{\alpha_t}{\alpha_0} + \frac{\alpha_s}{\alpha_0} \right) \mathbf{E} + \left( 1 + \frac{\alpha_t}{\alpha_0} - \frac{\alpha_s}{\alpha_0} - \frac{\alpha_t}{\alpha_s} \right) \mathbf{E}^2 \\ &= \frac{\alpha_t}{\alpha_0} \mathbf{I} + \mathbf{E}^2 - \frac{\alpha_t}{\alpha_0} \mathbf{E} + \left( \frac{\alpha_t}{\alpha_s} - \frac{\alpha_t}{\alpha_0} + \frac{\alpha_s}{\alpha_0} \right) (\mathbf{E} - \mathbf{E}^2) \\ &\quad \text{the fading matrix is idempotent} \Rightarrow \mathbf{E}^2 = \mathbf{E} \\ &= \frac{\alpha_t}{\alpha_0} \mathbf{I} + \left(1 - \frac{\alpha_t}{\alpha_0}\right) \mathbf{E} \\ &= \mathbf{P}_{t|0}. \end{aligned} \quad (25)$$

Similarly, for all  $0 \leq r \leq s \leq t \leq T$ , there holds the Chapman-Kolmogorov equation:

$$\begin{aligned} \mathbf{P}_{t|s} \mathbf{P}_{s|r} &= \left[ \frac{\alpha_t}{\alpha_s} \mathbf{I} + \left(1 - \frac{\alpha_t}{\alpha_s}\right) \mathbf{E} \right] \cdot \left[ \frac{\alpha_s}{\alpha_r} \mathbf{I} + \left(1 - \frac{\alpha_s}{\alpha_r}\right) \mathbf{E} \right] \\ &= \frac{\alpha_t}{\alpha_r} \mathbf{I} + \mathbf{E}^2 - \frac{\alpha_t}{\alpha_r} \mathbf{E} + \left( \frac{\alpha_t}{\alpha_s} - \frac{\alpha_t}{\alpha_r} + \frac{\alpha_s}{\alpha_r} \right) (\mathbf{E} - \mathbf{E}^2) \\ &\quad \text{the fading matrix is idempotent} \Rightarrow \mathbf{E}^2 = \mathbf{E} \\ &= \frac{\alpha_t}{\alpha_r} \mathbf{I} + \left(1 - \frac{\alpha_t}{\alpha_r}\right) \mathbf{E} \\ &= \mathbf{P}_{t|r}. \end{aligned} \quad (26)$$

61 We further note that  $\mathbf{P}_{t|s}$ ,  $\forall 0 \leq s \leq t \leq T$  is invertible, with inverse given by:

$$\mathbf{P}_{t|s}^{-1} = \frac{\alpha_s}{\alpha_t} \mathbf{I} + (1 - \frac{\alpha_s}{\alpha_t}) \mathbf{E}, \forall 0 \leq s \leq t \leq T. \quad (27)$$

$$\begin{aligned} \mathbf{P}_{t|s}^{-1} \mathbf{P}_{t|s} &= \left[ \frac{\alpha_s}{\alpha_t} \mathbf{I} + (1 - \frac{\alpha_s}{\alpha_t}) \mathbf{E} \right] \cdot \left[ \frac{\alpha_t}{\alpha_s} \mathbf{I} + (1 - \frac{\alpha_t}{\alpha_s}) \mathbf{E} \right] \\ &= \mathbf{I} + \left( \frac{\alpha_t}{\alpha_s} + \frac{\alpha_s}{\alpha_t} - 2 \right) \cdot (\mathbf{E} - \mathbf{E}^2) \\ &\quad \text{the fading matrix is idempotent} \Rightarrow \mathbf{E}^2 = \mathbf{E} \\ &= \mathbf{I}. \end{aligned} \quad (28)$$

62  $\forall 0 \leq r \leq s \leq t \leq T$ , combined with limiting distribution constraint  $\mathbf{P}_{t|r} = \mathbf{P}_{t|s,r} \mathbf{P}_{s|r}$ , there are:

$$\begin{aligned} \mathbf{P}_{t|s,r} &= \mathbf{P}_{t|r} \mathbf{P}_{s|r}^{-1} \\ &= \left[ \frac{\alpha_t}{\alpha_r} \mathbf{I} + (1 - \frac{\alpha_t}{\alpha_r}) \mathbf{E} \right] \cdot \left[ \frac{\alpha_r}{\alpha_s} \mathbf{I} + (1 - \frac{\alpha_r}{\alpha_s}) \mathbf{E} \right] \\ &= \frac{\alpha_t}{\alpha_s} \mathbf{I} + \mathbf{E}^2 - \frac{\alpha_t}{\alpha_s} \mathbf{E} + \left( \frac{\alpha_t}{\alpha_r} - \frac{\alpha_t}{\alpha_s} + \frac{\alpha_r}{\alpha_s} \right) (\mathbf{E} - \mathbf{E}^2) \\ &\quad \text{the fading matrix is idempotent} \Rightarrow \mathbf{E}^2 = \mathbf{E} \\ &= \frac{\alpha_t}{\alpha_s} \mathbf{I} + (1 - \frac{\alpha_t}{\alpha_s}) \mathbf{E} \\ &= \mathbf{P}_{t|s}. \end{aligned} \quad (29)$$

63  $\mathbf{P}_{t|s,r} = \mathbf{P}_{t|s}$  indicates  $p_{t|s,r}(x_t|x_s, x_r) = p_{t|s}(x_t|x_s)$ ,  $\forall 0 \leq r \leq s \leq t \leq T$ . In summary, the  
64 preference fading discrete diffusion process is Markovian but not time-homogeneous, satisfies the  
65 Chapman–Kolmogorov equation, and is reversible.  $\square$

66 *Proof of Proposition ??:*  $\alpha_t : [0, T] \rightarrow [0, 1]$  is a strictly decreasing function with  $\alpha_0 = 1$  and  
67  $\alpha_T = 0$ .  $\alpha_t$  is further defined as  $e^{-\int_0^t \beta(\tau) d\tau}$  with  $\beta(\tau) > 0$ . The preference fading discrete Markov  
68 diffusion process is denoted as  $\mathbf{P}_{t|s} = \frac{\alpha_t}{\alpha_s} \mathbf{I} + (1 - \frac{\alpha_t}{\alpha_s}) \mathbf{E}$ ,  $\forall 0 \leq s \leq t \leq T$ . We first show that the  
69 preference fading discrete Markov diffusion process converges to a unified non-preference state  $\vec{p}_T$  is  
70 well-defined. The transition rate matrix  $\mathbf{Q}_t$  is computed as follows:

$$\begin{aligned} \mathbf{Q}_t &= \lim_{s \rightarrow t} \frac{\partial \mathbf{P}_{t|s}}{\partial t} \\ &= \lim_{s \rightarrow t} \frac{\partial}{\partial t} \left( \frac{\alpha_t}{\alpha_s} \mathbf{I} + (1 - \frac{\alpha_t}{\alpha_s}) \mathbf{E} \right) \\ &= \lim_{s \rightarrow t} \frac{\partial}{\partial \alpha_t} \left( \frac{\alpha_t}{\alpha_s} \mathbf{I} + (1 - \frac{\alpha_t}{\alpha_s}) \mathbf{E} \right) \cdot \frac{\partial \alpha_t}{\partial t} \\ &= \lim_{s \rightarrow t} \left( \frac{1}{\alpha_s} \mathbf{I} - \frac{1}{\alpha_s} \mathbf{E} \right) \cdot (-\beta(t)) \cdot \alpha_t \\ &= \beta(t) \cdot (\mathbf{E} - \mathbf{I}). \end{aligned} \quad (30)$$

71 The rate matrix  $\mathbf{Q}_t$  characterizes the velocity of probability transitions at time  $t$ , encompassing  
72 both the direction and rate of transition. As shown in Equation (31),  $\mathbf{Q}_t$  at any time  $t \in [0, T]$   
73 shares a consistent transition direction  $\mathbf{I} - \mathbf{E}$ , while the transition rate  $\beta(t)$  varies over time. This  
74 time-dependent rate results in a non-homogeneous preference fading process. However, the shared  
75 transition direction ensures that all diffusion paths converge to the same non-preference state, making  
76 the process well-defined. Specifically, the stationary distribution  $\vec{\pi}_t$  at time  $t$  satisfies the equilibrium  
77 condition  $\mathbf{Q}_t \vec{\pi}_t = \vec{0}$ . Since different  $\mathbf{Q}_t$  matrices differ only by a scalar factor  $\beta(t)$ , they yield the  
78 same stationary solution  $\vec{\pi}$ . Consequently, the Markov process converges to a common steady-state  
79 distribution  $\vec{\pi}$ , i.e., the non-preference state  $\vec{p}_T$ :

$$\mathbf{Q}_t \vec{\pi} = \vec{0} \Rightarrow (\mathbf{I} - \mathbf{E}) \vec{p}_T = \vec{0}. \quad (31)$$

80 Given that  $(\mathbf{I} - \mathbf{E})\mathbf{E} = \mathbf{0}$ , each column of  $\mathbf{E}$  satisfies the non-preference state equation  $(\mathbf{I} - \mathbf{E})\vec{p}_T =$   
81  $\vec{0}$ . To ensure a unique solution  $\vec{p}_T$ , we therefore assume that all columns of  $\mathbf{E}$  are identical, i.e.  
82  $\mathbf{E} \propto \vec{p}_T \cdot \vec{1}^\top$ . Considering the idempotence constraint  $\mathbf{E}^2 = \mathbf{E}$ , we then have:

$$\mathbf{E} = \frac{\vec{p}_T \cdot \vec{1}^\top}{\vec{1}^\top \vec{p}_T}. \quad (32)$$

$$\begin{aligned} \mathbf{E}^2 &= \frac{\vec{p}_T \cdot \vec{1}^\top \cdot \vec{p}_T \cdot \vec{1}^\top}{(\vec{1}^\top \vec{p}_T)^2} \\ &= \frac{\vec{p}_T \cdot (\vec{1}^\top \vec{p}_T) \cdot \vec{1}^\top}{(\vec{1}^\top \vec{p}_T)^2} \\ &= \frac{\vec{p}_T \cdot \vec{1}^\top}{\vec{1}^\top \vec{p}_T} \\ &= \mathbf{E}. \end{aligned} \quad (33)$$

83 □

84 *Proof of Proposition ??:* We have  $\mathbf{P}_{t|s} = \frac{\alpha_t}{\alpha_s} \mathbf{I} + (1 - \frac{\alpha_t}{\alpha_s}) \mathbf{E}$  and  $\mathbf{Q}_t = \beta(t) \cdot (\mathbf{E} - \mathbf{I})$ . Then we  
85 compute  $\frac{\partial \mathbf{P}_{t|s}}{\partial t}$  as follows:

$$\begin{aligned} \frac{\partial \mathbf{P}_{t|s}}{\partial t} &= \frac{\partial}{\partial t} \left( \frac{\alpha_t}{\alpha_s} \mathbf{I} + (1 - \frac{\alpha_t}{\alpha_s}) \mathbf{E} \right) \\ &= \frac{\partial}{\partial \alpha_t} \left( \frac{\alpha_t}{\alpha_s} \mathbf{I} + (1 - \frac{\alpha_t}{\alpha_s}) \mathbf{E} \right) \cdot \frac{\partial \alpha_t}{\partial t} \\ &= \left( \frac{1}{\alpha_s} \mathbf{I} - \frac{1}{\alpha_s} \mathbf{E} \right) \cdot (-\beta(t)) \cdot \alpha_t \\ &= \beta(t) \cdot \frac{\alpha_t}{\alpha_s} \cdot (\mathbf{E} - \mathbf{I}). \end{aligned} \quad (34)$$

86 There holds the Kolmogorov forward equation:

$$\begin{aligned} \mathbf{Q}_t \mathbf{P}_{t|s} &= \beta(t) \cdot (\mathbf{E} - \mathbf{I}) \cdot \left[ \frac{\alpha_t}{\alpha_s} \mathbf{I} + (1 - \frac{\alpha_t}{\alpha_s}) \mathbf{E} \right] \\ &= \beta(t) \cdot \left[ -\frac{\alpha_t}{\alpha_s} \mathbf{I} + (2\frac{\alpha_t}{\alpha_s} - 1) \mathbf{E} + (1 - \frac{\alpha_t}{\alpha_s}) \mathbf{E}^2 \right] \\ &\quad \text{the fading matrix is idempotent} \Rightarrow \mathbf{E}^2 = \mathbf{E} \\ &= \beta(t) \cdot \frac{\alpha_t}{\alpha_s} \cdot (\mathbf{E} - \mathbf{I}) \\ &= \frac{\partial \mathbf{P}_{t|s}}{\partial t}. \end{aligned} \quad (35)$$

87 □

88 *Proof of Theorem ??:* The reverse preference growing process is denoted as  $\Omega = \{\mathbf{P}_{s|T}\}_{s=T}^0$ . A  
89 collection  $\mathcal{F}$  of subsets of  $\Omega$  is called a  $\sigma$ -algebra on  $\Omega$  if it satisfies: 1)  $\Omega \in \mathcal{F}$ . 2) If  $A \in \mathcal{F}$  then  
90 its complement  $A^c = \Omega \setminus A$  also belongs to  $\mathcal{F}$ . 3) If  $\{A_n\}_{n=1}^\infty \subseteq \mathcal{F}$ , then the countable union  
91  $\bigcup_{n=1}^\infty A_n \in \mathcal{F}$ . We first show that the preference growing process satisfies the Markov property.  $\mathcal{F}_t$   
92 is a  $\sigma$ -algebra of the preference growing process  $\Omega_t = \{\mathbf{P}_{s|T}\}_{s=T}^t$ .  $\forall A \in \mathcal{F}_t$  and  $0 \leq s \leq t \leq T$ :

$$\begin{aligned} p_{s| \geq t}(x_s | x_t, A) &= \frac{p_{s, t| > t}(x_s, x_t | A)}{p_{t| > t}(x_t | A)} \cdot \frac{p(A)}{p(A)} \\ &= \frac{p_{s, \geq t}(x_s, x_t, A)}{p_{\geq t}(x_t, A)} \\ &= \frac{p_{> t| t, s}(A | x_t, x_s)}{p_{> t| t}(A | x_t)} \cdot \frac{p_{t| s}(x_t | x_s) p_s(x_s)}{p_t(x_t)} \end{aligned} \quad (36)$$

$$\begin{aligned}
& \text{the preference fading process is Markovian} \Rightarrow \frac{p_{>t|t,s}(A|x_t, x_s)}{p_{>t|t}(A|x_t)} = 1 \\
& = \frac{p_s(x_s)}{p_t(x_t)} p_{t|s}(x_t|x_s) \\
& \text{the Bayes' theorem} \Rightarrow \frac{p_s(x_s)}{p_t(x_t)} p_{t|s}(x_t|x_s) = p_{s|t}(x_s|x_t) \\
& = p_{s|t}(x_s|x_t).
\end{aligned}$$

93 We rewrite the equation  $p_{s|t}(x_s|x_t) = \frac{p_s(x_s)}{p_t(x_t)} \cdot p_{t|s}(x_t|x_s)$  in matrix form  $\forall 0 \leq s \leq t \leq T$ :

$$\begin{aligned}
p_{s|t}(x_s|x_t) &= \frac{p_s(x_s)}{p_t(x_t)} \cdot p_{t|s}(x_t|x_s). \tag{37} \\
\vec{p}_s \cdot \left( \frac{1}{\vec{p}_t} \right)^\top & \text{ denotes the matrix with entries } \frac{p_s(x_s=y)}{p_t(x_t=y)}, \forall x, y \in \mathcal{X} \\
\mathbf{P}_{s|t} &= \left[ \vec{p}_s \cdot \left( \frac{1}{\vec{p}_t} \right)^\top \right] \odot \mathbf{P}_{t|s}^\top \\
\vec{p}_t &= \mathbf{P}_{t|s} \cdot \vec{p}_s \Rightarrow \vec{p}_s = \mathbf{P}_{s|t}^{-1} \cdot \vec{p}_t \\
&= \mathbf{P}_{t|s}^{-1} \cdot \left[ \vec{p}_t \cdot \left( \frac{1}{\vec{p}_t} \right)^\top \right] \odot \mathbf{P}_{t|s}^\top.
\end{aligned}$$

94 The reverse-time preference growing process progresses from  $s = T$  to  $s = 0$ , and thus  $\alpha_s$  is an  
95 increasing function, transitioning from  $\alpha_T = 0$  to  $\alpha_0 = 1$ . We then compute the reverse transition  
96 rate matrix  $\mathbf{R}_s$  as follows:

$$\begin{aligned}
\mathbf{R}_s &= \lim_{t \rightarrow s} \frac{\partial \mathbf{P}_{s|t}}{\partial s} \\
&= \lim_{t \rightarrow s} \frac{\partial \mathbf{P}_{s|t}}{\partial \alpha_s} \cdot \frac{\partial \alpha_s}{\partial s} \tag{38} \\
&= \lim_{t \rightarrow s} \frac{\partial}{\partial \alpha_s} \left( \mathbf{P}_{t|s}^{-1} \cdot \left[ \vec{p}_t \cdot \left( \frac{1}{\vec{p}_t} \right)^\top \right] \odot \mathbf{P}_{t|s}^\top \right) \cdot \frac{\partial \alpha_s}{\partial s} \\
&= \lim_{t \rightarrow s} \left( \frac{\partial \mathbf{P}_{t|s}^{-1}}{\partial \alpha_s} \cdot \left[ \vec{p}_t \cdot \left( \frac{1}{\vec{p}_t} \right)^\top \right] \odot \mathbf{P}_{t|s}^\top + \mathbf{P}_{t|s}^{-1} \cdot \left[ \vec{p}_t \cdot \left( \frac{1}{\vec{p}_t} \right)^\top \right] \odot \frac{\partial \mathbf{P}_{t|s}^\top}{\partial \alpha_s} \right) \cdot \frac{\partial \alpha_s}{\partial s} \\
\frac{\partial \mathbf{P}_{t|s}^{-1}}{\partial \alpha_s} &= \frac{\partial}{\partial \alpha_s} \left( \frac{\alpha_s}{\alpha_t} \mathbf{I} + \left( 1 - \frac{\alpha_s}{\alpha_t} \right) \mathbf{E} \right) = \frac{1}{\alpha_t} (\mathbf{I} - \mathbf{E}) \\
\lim_{t \rightarrow s} \mathbf{P}_{t|s}^{-1} &= \lim_{t \rightarrow s} \left( \frac{\alpha_s}{\alpha_t} \mathbf{I} + \left( 1 - \frac{\alpha_s}{\alpha_t} \right) \mathbf{E} \right) = \mathbf{I} \\
\frac{\partial \mathbf{P}_{t|s}^\top}{\partial \alpha_s} &= \frac{\partial}{\partial \alpha_s} \left( \frac{\alpha_t}{\alpha_s} \mathbf{I} + \left( 1 - \frac{\alpha_t}{\alpha_s} \right) \mathbf{E}^\top \right) = -\frac{\alpha_t}{\alpha_s^2} (\mathbf{I} - \mathbf{E}^\top) \\
\lim_{t \rightarrow s} \mathbf{P}_{t|s}^\top &= \lim_{t \rightarrow s} \left( \frac{\alpha_t}{\alpha_s} \mathbf{I} + \left( 1 - \frac{\alpha_t}{\alpha_s} \right) \mathbf{E}^\top \right) = \mathbf{I} \\
&= \lim_{t \rightarrow s} \left( \frac{1}{\alpha_t} (\mathbf{I} - \mathbf{E}) \cdot \left[ \vec{p}_t \cdot \left( \frac{1}{\vec{p}_t} \right)^\top \right] \odot \mathbf{I} - \left[ \vec{p}_t \cdot \left( \frac{1}{\vec{p}_t} \right)^\top \right] \odot \frac{\alpha_t}{\alpha_s^2} (\mathbf{I} - \mathbf{E}^\top) \right) \cdot \frac{\partial \alpha_s}{\partial s} \\
&\quad \mathbf{Q}_t = \beta(t) \cdot (\mathbf{E} - \mathbf{I}), \mathbf{Q}_t^\top = \beta(t) \cdot (\mathbf{E}^\top - \mathbf{I}) \\
&\quad \text{Note that from time } t \text{ to time } s < t, \alpha_s \text{ is increasing.} \Rightarrow \frac{\partial \alpha_s}{\partial s} = \alpha_s \beta(s) > 0 \\
&= \beta(s) \cdot (\mathbf{E}^\top - \mathbf{I}) \odot \left[ \vec{p}_s \cdot \left( \frac{1}{\vec{p}_s} \right)^\top \right] - \beta(s) \cdot (\mathbf{E} - \mathbf{I}) \cdot \left[ \vec{p}_s \cdot \left( \frac{1}{\vec{p}_s} \right)^\top \right] \odot \mathbf{I}
\end{aligned}$$

$$= \mathbf{Q}_s^\top \odot \left[ \vec{p}_s \cdot \left( \frac{1}{\vec{p}_s} \right)^\top \right] - \mathbf{Q}_s \cdot \left[ \vec{p}_t \cdot \left( \frac{1}{\vec{p}_t} \right)^\top \right] \odot \mathbf{I}.$$

97 Moreover, we compute  $\frac{\partial \mathbf{P}_{t|s}}{\partial s}$  and  $\frac{\partial \mathbf{P}_{s|t}}{\partial s}$  as follows:

$$\frac{\partial \mathbf{P}_{t|s}}{\partial s} = \frac{\partial}{\partial \alpha_s} \left( \frac{\alpha_t}{\alpha_s} \mathbf{I} + \left( 1 - \frac{\alpha_t}{\alpha_s} \right) \mathbf{E} \right) \cdot \frac{\partial \alpha_s}{\partial s} \quad (39)$$

Note that from time  $t$  to time  $s < t$ ,  $\alpha_s$  is increasing.  $\Rightarrow \frac{\partial \alpha_s}{\partial s} = \alpha_s \beta(s) > 0$

$$\begin{aligned} &= \left( -\frac{\alpha_t}{\alpha_s^2} \mathbf{I} + \frac{\alpha_t}{\alpha_s^2} \mathbf{E} \right) \cdot \alpha_s \beta(s) \\ &= \beta(s) \cdot \frac{\alpha_t}{\alpha_s} \cdot (\mathbf{E} - \mathbf{I}) \\ &\quad (\mathbf{E} - \mathbf{I})^2 = \mathbf{E}^2 - 2\mathbf{E} + \mathbf{I} = -(\mathbf{E} - \mathbf{I}), (\mathbf{E} - \mathbf{I}) \mathbf{E} = \mathbf{0} \\ &= \beta(s) \cdot \left[ -\frac{\alpha_t}{\alpha_s} \cdot (\mathbf{E} - \mathbf{I})^2 \right] + \beta(s) \cdot (\mathbf{E} - \mathbf{I}) \mathbf{E} \\ &= \left[ \frac{\alpha_t}{\alpha_s} \mathbf{I} + \left( 1 - \frac{\alpha_t}{\alpha_s} \right) \mathbf{E} \right] \cdot [\beta(s) \cdot (\mathbf{E} - \mathbf{I})] \\ &= \mathbf{P}_{t|s} \mathbf{Q}_s. \end{aligned}$$

$$\frac{\partial \mathbf{P}_{s|t}}{\partial s} = \frac{\partial}{\partial s} \left( \mathbf{P}_{t|s}^{-1} \cdot \left[ \vec{p}_t \cdot \left( \frac{1}{\vec{p}_t} \right)^\top \right] \odot \mathbf{P}_{t|s}^\top \right) \quad (40)$$

$$\begin{aligned} &= \frac{\partial}{\partial s} \left( \left[ \vec{p}_s \cdot \left( \frac{1}{\vec{p}_t} \right)^\top \right] \odot \mathbf{P}_{t|s}^\top \right) \\ &= \left[ \frac{\partial \vec{p}_s}{\partial s} \cdot \left( \frac{1}{\vec{p}_t} \right)^\top \right] \odot \mathbf{P}_{t|s}^\top + \left[ \vec{p}_s \cdot \left( \frac{1}{\vec{p}_t} \right)^\top \right] \odot \frac{\partial \mathbf{P}_{t|s}^\top}{\partial s} \end{aligned}$$

The reverse time  $s$  begins with  $s = T$ .  $\Rightarrow \frac{\partial \mathbf{P}_{s|0}}{\partial s} = -\mathbf{Q}_s \cdot \mathbf{P}_{s|0}$

$$\frac{\partial \vec{p}_s}{\partial s} = \frac{\partial \mathbf{P}_{s|0} \cdot \vec{p}_0}{\partial s} = -\mathbf{Q}_s \cdot \mathbf{P}_{s|0} \cdot \vec{p}_0 = -\mathbf{Q}_s \cdot \vec{p}_s$$

$$\begin{aligned} \frac{\partial \mathbf{P}_{t|s}}{\partial s} &= \mathbf{P}_{t|s} \cdot \mathbf{Q}_s \Rightarrow \frac{\partial \mathbf{P}_{t|s}^\top}{\partial s} = (\mathbf{P}_{t|s} \cdot \mathbf{Q}_s)^\top = \mathbf{Q}_s^\top \cdot \mathbf{P}_{t|s}^\top \\ &= \left[ \vec{p}_s \cdot \left( \frac{1}{\vec{p}_t} \right)^\top \right] \odot (\mathbf{Q}_s^\top \cdot \mathbf{P}_{t|s}^\top) - \left[ \mathbf{Q}_s \cdot \vec{p}_s \cdot \left( \frac{1}{\vec{p}_t} \right)^\top \right] \odot \mathbf{P}_{t|s}^\top. \end{aligned}$$

98 Finally, we prove that the preference growing process satisfies the Kolmogorov backward equation:

$$\mathbf{R}_s \mathbf{P}_{s|t} = \left\{ \mathbf{Q}_s^\top \odot \left[ \vec{p}_s \cdot \left( \frac{1}{\vec{p}_s} \right)^\top \right] - \mathbf{Q}_s \cdot \left[ \vec{p}_t \cdot \left( \frac{1}{\vec{p}_t} \right)^\top \right] \odot \mathbf{I} \right\} \cdot \left\{ \left[ \vec{p}_s \cdot \left( \frac{1}{\vec{p}_t} \right)^\top \right] \odot \mathbf{P}_{t|s}^\top \right\} \quad (41)$$

The idea behind this step is to prove that the elements at each position of the matrices are identical, thereby establishing their equality.

The details are provided in Equation (42), (43) and (44).

$$\begin{aligned} &= \left\{ \left[ \vec{p}_s \cdot \left( \frac{1}{\vec{p}_t} \right)^\top \right] \odot (\mathbf{Q}_s^\top \cdot \mathbf{P}_{t|s}^\top) \right\} - \left\{ \left[ \mathbf{Q}_s \cdot \vec{p}_s \cdot \left( \frac{1}{\vec{p}_t} \right)^\top \right] \odot \mathbf{P}_{t|s}^\top \right\} \\ &= \frac{\partial \mathbf{P}_{s|t}}{\partial s}. \end{aligned}$$

$$\begin{aligned}
& \left\{ \mathbf{Q}_s^\top \odot \left[ \vec{p}_s \cdot \left( \frac{1}{\vec{p}_s} \right)^\top \right] \right\} \cdot \left\{ \left[ \vec{p}_s \cdot \left( \frac{1}{\vec{p}_t} \right)^\top \right] \odot \mathbf{P}_{t|s}^\top \right\} (x, y) \\
&= \sum_{z \in \mathcal{X}} q_s(z, x) \frac{p_s(x)}{p_s(z)} \cdot \frac{p_s(z)}{p_t(y)} p_{t|s}(y|z) \\
&= \frac{p_s(x)}{p_t(y)} \cdot \sum_{z \in \mathcal{X}} q_s(z, x) p_{t|s}(y|z) \\
&= \left\{ \left[ \vec{p}_s \cdot \left( \frac{1}{\vec{p}_t} \right)^\top \right] \odot (\mathbf{Q}_s^\top \cdot \mathbf{P}_{t|s}^\top) \right\} (x, y), \forall x, y \in \mathcal{X}.
\end{aligned} \tag{42}$$

$$\begin{aligned}
& \left\{ \mathbf{Q}_s \cdot \left[ \vec{p}_s \cdot \left( \frac{1}{\vec{p}_s} \right)^\top \right] \odot \mathbf{I} \right\} (x, y) \\
&= \sum_{z \in \mathcal{X}} q_s(x, z) \frac{p_s(z)}{p_s(y)} \cdot \delta_x(y) \\
&= \delta_x(y) \cdot \sum_{l \in \mathcal{X}} q_s(x, l) \frac{p_s(l)}{p_s(x)}.
\end{aligned} \tag{43}$$

$$\begin{aligned}
& \left\{ \mathbf{Q}_s \cdot \left[ \vec{p}_s \cdot \left( \frac{1}{\vec{p}_s} \right)^\top \right] \odot \mathbf{I} \right\} \cdot \left\{ \left[ \vec{p}_s \cdot \left( \frac{1}{\vec{p}_t} \right)^\top \right] \odot \mathbf{P}_{t|s}^\top \right\} (x, y) \\
&= \sum_{z \in \mathcal{X}} \delta_x(z) \cdot \sum_{l \in \mathcal{X}} q_s(x, l) \frac{p_s(l)}{p_s(x)} \cdot \frac{p_s(z)}{p_t(y)} p_{t|s}(y|z) \\
&= \sum_{l \in \mathcal{X}} q_s(x, l) \frac{p_s(l)}{p_s(x)} \cdot \frac{p_s(x)}{p_t(y)} p_{t|s}(y|x) \\
&= p_{t|s}(y|x) \cdot \sum_{l \in \mathcal{X}} q_s(x, l) \frac{p_t(l)}{p_t(y)} \\
&= p_{t|s}(y|x) \cdot \sum_{l \in \mathcal{X}} q_s(x, l) \frac{p_s(l)}{p_t(y)} \\
&= \left\{ \left[ \mathbf{Q}_s \cdot \vec{p}_s \cdot \left( \frac{1}{\vec{p}_t} \right)^\top \right] \odot \mathbf{P}_{t|s}^\top \right\} (x, y), \forall x, y \in \mathcal{X}.
\end{aligned} \tag{44}$$

99

□

## 100 C Details of Different Fading Matrix Setting

### 101 C.1 Point-Wise Setting

Let  $\vec{p}_1 = \vec{e}_{-1} \in \mathbb{R}^{N+1}$ , we have fading matrix  $\mathbf{E}$  as follows:

$$\mathbf{E} = \begin{pmatrix} 0 & \cdots & 0 & 0 \\ \vdots & \ddots & \vdots & \vdots \\ 0 & \cdots & 0 & 0 \\ 1 & \cdots & 1 & 1 \end{pmatrix}$$

In this case, the reference ratios  $r_t(x_0, x_t \in \{x_0, x_{-1}\}, y \in \{x_0, x_{-1}\})$  model only the ratios between the general hard negative  $x_{-1}$  and real items  $\mathcal{X}$ .

$$r_t(x_0, x_t, y) = \begin{cases} r_t(x_0, x_t, x_t) = 0 & \text{if } x_t = y \\ r_t(x_0, x_0, x_{-1}) = \log \frac{1-\alpha_t}{\alpha_t} & \text{if } y = x_{-1} \text{ and } x_t = x_0 \\ r_t(x_0, x_{-1}, x_0) = \log \frac{\alpha_t}{1-\alpha_t} & \text{if } y = x_0 \text{ and } x_t = x_{-1} \end{cases}$$

$$\mathbf{Q}_t(x, y) = \beta(t) \cdot (\mathbf{E} - \mathbf{I}) = \begin{cases} -\beta(t) & \text{if } x = y \neq x_{-1} \\ \beta(t) & \text{if } x = x_{-1} \text{ and } x_t \neq x_{-1} \\ 0 & \text{otherwise} \end{cases}$$

We estimate the preference ratios  $\log \frac{p_t(y|u)}{p_t(x_t|u)}$  with  $s_\Theta(x_t, t, u)_y$ :

$$l_{SE}(x_0, x_t, y|u) = e^{s_\Theta(x_t, t, u)_y} - e^{r_t(x_0, x_t, y)} s_\Theta(x_t, t, u)_y + e^{r_t(x_0, x_t, y)} [r_t(x_0, x_t, y) - 1].$$

102 For one user preference data  $(u, x_0)$ , with faded item  $x_t$ , we compute  $\mathcal{L}_{SE}(x_0, x_t, y|u)$ :

$$\begin{aligned} \mathcal{L}_{SE} &= \sum_{y \in \{x_0, x_{-1}\}} \mathbf{Q}_t(x_t, y) \cdot l_{SE}(x_0, x_t, y|u) \\ &= \mathbf{Q}_t(x_t, x_t) \cdot l_{SE}(x_0, x_t, x_t|u) + \sum_{y \in \{x_0, x_{-1}\} \setminus \{x_t\}} \mathbf{Q}_t(x_t, y) \cdot l_{SE}(x_0, x_t, y|u) \\ &\quad s_\Theta(x_t, t, u)_{x_t} = r_t(x_0, x_t, x_t) = 0 \Rightarrow l_{SE}(x_0, x_t, x_t|u) = 0 \\ &= \sum_{y \in \{x_0, x_{-1}\} \setminus \{x_t\}} \mathbf{Q}_t(x_t, y) \cdot l_{SE}(x_0, x_t, y|u) \\ &\quad \mathbf{Q}_t(x_t \neq x_{-1}, y \neq x_t) = 0 \Rightarrow \mathcal{L}_{SE}(x_0, x_0, y|u) = 0 \Rightarrow x_t = x_{-1} \\ &= \mathbf{Q}_t(x_{-1}, x_0) \cdot l_{SE}(x_0, x_{-1}, x_0|u) \\ &= \beta(t) \cdot \left[ e^{s_\Theta(x_t, t, u)_y} - \frac{\alpha_t}{1-\alpha_t} \cdot s_\Theta(x_t, t, u)_y + \frac{\alpha_t}{1-\alpha_t} [\log \frac{\alpha_t}{1-\alpha_t} - 1] \right]. \end{aligned}$$

## 103 C.2 Pair-Wise Setting

Let  $\vec{p}_T = \vec{1} \in \mathbb{R}^N$ , we have fading matrix  $\mathbf{E}$  as follows:

$$\mathbf{E} = \begin{pmatrix} \frac{1}{N} & \cdots & \frac{1}{N} \\ \vdots & \ddots & \vdots \\ \frac{1}{N} & \cdots & \frac{1}{N} \end{pmatrix}$$

In this case, the reference ratios  $r_t(x_0, x_t \in \mathcal{X}, y \in \mathcal{X})$  model the ratios of all item pairs.

$$r_t(x_0, x_t, y) = \begin{cases} r_t(x_0, x_t, x_t) = 0 & \text{if } x_t = y \\ r_t(x_0, x_0, y \neq x_0) = -\log(1 + N \cdot \frac{\alpha_t}{1-\alpha_t}) & \text{if } y \neq x_0 \text{ and } x_t = x_0 \\ r_t(x_0, x_t \neq x_0, x_0) = \log(1 + N \cdot \frac{\alpha_t}{1-\alpha_t}) & \text{if } y = x_0 \text{ and } x_t \neq x_0 \\ r_t(x_0, x_t \neq x_0, y \neq x_0) = 0 & \text{otherwise} \end{cases}$$

$$\mathbf{Q}_t(x, y) = \beta(t) \cdot (\mathbf{E} - \mathbf{I}) = \begin{cases} \beta(t)(\frac{1}{N} - 1) & \text{if } x = y \\ \beta(t) \cdot \frac{1}{N} & \text{otherwise} \end{cases}$$

We estimate the preference ratios  $\log \frac{p_t(y|u)}{p_t(x_t|u)}$  with  $s_\Theta(x_t, t, u)_y$ :

$$l_{SE}(x_0, x_t, y|u) = e^{s_\Theta(x_t, t, u)_y} - e^{r_t(x_0, x_t, y)} s_\Theta(x_t, t, u)_y + e^{r_t(x_0, x_t, y)} [r_t(x_0, x_t, y) - 1].$$

104 For one user preference data  $(u, x_0)$ , with faded item  $x_t$ , we compute  $\mathcal{L}_{SE}(x_0, x_t, y|u)$ :

$$\mathcal{L}_{SE} = \sum_{y \in \mathcal{X}} \mathbf{Q}_t(x_t, y) \cdot l_{SE}(x_0, x_t, y|u)$$



$$\begin{aligned}
&= \mathbf{Q}_t(x_t, x_t) \cdot l_{SE}(x_0, x_t, x_t|u) + \sum_{y \in \mathcal{X} \setminus \{x_t\}} \mathbf{Q}_t(x_t, y) \cdot l_{SE}(x_0, x_t, y|u) \\
&\quad s_{\Theta}(x_t, t, u)_{x_t} = r_t(x_0, x_t, x_t) = 0 \Rightarrow l_{SE}(x_0, x_t, x_t|u) = 0 \\
&= \sum_{y \in \mathcal{X} \setminus \{x_t\}} \mathbf{Q}_t(x_t, y) \cdot l_{SE}(x_0, x_t, y|u) \\
&\quad \mathbf{Q}_t(x_t, y \neq x_t) = \beta(t) \cdot \frac{1}{N} \\
&= \beta(t) \cdot \frac{1}{N} \cdot \sum_{y \in \mathcal{X} \setminus \{x_t\}} l_{SE}(x_0, x_{-1}, x_0|u) \\
&\quad e^{\bar{s}_{\Theta}(x_t, t, u)} = \frac{1}{N} \cdot \sum_{y \in \mathcal{X} \setminus \{x_t\}} e^{s_{\Theta}(x_t, t, u)_y} = \frac{1}{N} \cdot \left[ \sum_{y \in \mathcal{X}} e^{s_{\Theta}(x_t, t, u)_y} - 1 \right] \\
&\quad \bar{s}_{\Theta}(x_t, t, u) = \frac{1}{N} \cdot \sum_{y \in \mathcal{X} \setminus \{x_t\}} s_{\Theta}(x_t, t, u)_y = \frac{1}{N} \cdot \sum_{y \in \mathcal{X}} s_{\Theta}(x_t, t, u)_y \\
&\text{if } x_t = x_0, \text{ denote } \Delta = N \cdot \frac{\alpha_t}{1 - \alpha_t} : \\
&= \beta(t) \cdot \left[ e^{\bar{s}_{\Theta}(x_t, t, u)} - \frac{1}{1 + \Delta} \cdot \bar{s}_{\Theta}(x_t, t, u) - \frac{1}{1 + \Delta} (\log(1 + \Delta) + 1) \right] \\
&\text{if } x_t \neq x_0, \text{ denote } \Delta = N \cdot \frac{\alpha_t}{1 - \alpha_t} : \\
&= \beta(t) \cdot \left[ e^{\bar{s}_{\Theta}(x_t, t, u)} - \bar{s}_{\Theta}(x_t, t, u) - \Delta \cdot s_{\Theta}(x_t, t, u)_{x_0} + (1 + \Delta)(\log(1 + \Delta) - 1) \right].
\end{aligned}$$

### 105 C.3 Hybrid-Wise Setting

Let  $\vec{p}_1 = \lambda(\vec{1}, 0) + (1 - \lambda)\vec{e}_{-1} \in \mathbb{R}^{n+1}$ , we have fading matrix  $\mathbf{E}$  as follows:

$$\mathbf{E} = \begin{pmatrix} \frac{\lambda}{N} & \cdots & \frac{\lambda}{N} & \frac{\lambda}{N} \\ \vdots & \ddots & \vdots & \vdots \\ \frac{\lambda}{N} & \cdots & \frac{\lambda}{N} & \frac{\lambda}{N} \\ 1 - \lambda & \cdots & 1 - \lambda & 1 - \lambda \end{pmatrix}$$

In this case, the reference ratios  $r_t(x_0, x_t \in \mathcal{X}, y \in \mathcal{X})$  model the ratios of all item pairs.

$$r_t(x_0, x_t, y) = \begin{cases} 0 & \text{if } x_t = y \\ \log \frac{\alpha_t + (1 - \alpha_t) \frac{\lambda}{N}}{(1 - \alpha_t)(1 - \lambda)} & \text{else if } y = x_0 \text{ and } x_t = x_{-1} \\ \log \frac{\frac{\lambda}{N}}{(1 - \lambda)} & \text{else if } y \neq x_0 \text{ and } x_t = x_{-1} \\ \log \frac{(1 - \alpha_t)(1 - \lambda)}{\alpha_t + (1 - \alpha_t) \frac{\lambda}{N}} & \text{else if } y = x_{-1} \text{ and } x_t = x_0 \\ \log \frac{(1 - \alpha_t) \frac{\lambda}{N}}{\alpha_t + (1 - \alpha_t) \frac{\lambda}{N}} & \text{else if } y \neq x_{-1} \text{ and } x_t = x_0 \\ \log \frac{(1 - \alpha_t)(1 - \lambda)}{(1 - \alpha_t) \frac{\lambda}{N}} & \text{else if } y = x_{-1} \text{ and } x_t \neq \{x_{-1}, x_0\} \\ \log \frac{\alpha_t + (1 - \alpha_t) \frac{\lambda}{N}}{(1 - \alpha_t) \frac{\lambda}{N}} & \text{else if } y = x_0 \text{ and } x_t \neq \{x_{-1}, x_0\} \\ 0 & \text{else if } y \neq \{x_{-1}, x_0\} \text{ and } x_t \neq \{x_{-1}, x_0\} \end{cases}$$

$$\mathbf{Q}_t(x, y) = \beta(t) \cdot (\mathbf{E} - \mathbf{I}) = \begin{cases} \beta(t)(-\lambda) & \text{if } x = y = x_{-1} \\ \beta(t)(\frac{\lambda}{N} - 1) & \text{if } x = y \neq x_{-1} \\ \beta(t)(1 - \lambda) & \text{if } x \neq y \text{ and } x = x_{-1} \\ \beta(t)(\frac{\lambda}{N}) & \text{if } x \neq y \text{ and } x \neq x_{-1} \end{cases}$$

We estimate the preference ratios  $\log \frac{p_t(y|u)}{p_t(x_t|u)}$  with  $s_{\Theta}(x_t, t, u)_y$ :

$$l_{SE}(x_0, x_t, y|u) = e^{s_{\Theta}(x_t, t, u)_y} - e^{r_t(x_0, x_t, y)} s_{\Theta}(x_t, t, u)_y + e^{r_t(x_0, x_t, y)} [r_t(x_0, x_t, y) - 1].$$

106 For one user preference data  $(u, x_0)$ , with faded item  $x_t$ , we compute  $\mathcal{L}_{SE}(x_0, x_t, y|u)$ :

$$\begin{aligned}
\mathcal{L}_{SE} &= \sum_{y \in \mathcal{X}} \mathbf{Q}_t(x_t, y) \cdot l_{SE}(x_0, x_t, y|u) \\
&= \mathbf{Q}_t(x_t, x_t) \cdot l_{SE}(x_0, x_t, x_t|u) + \sum_{y \in \mathcal{X} \setminus \{x_t\}} \mathbf{Q}_t(x_t, y) \cdot l_{SE}(x_0, x_t, y|u) \\
&\quad s_{\Theta}(x_t, t, u)_{x_t} = r_t(x_0, x_t, x_t) = 0 \Rightarrow l_{SE}(x_0, x_t, x_t|u) = 0 \\
&= \sum_{y \in \mathcal{X} \setminus \{x_t\}} \mathbf{Q}_t(x_t, y) \cdot l_{SE}(x_0, x_t, y|u) \\
&\quad \mathbf{Q}_t(x_t = x_{-1}, y \neq x_t) = \beta(t) \cdot (1 - \lambda), \mathbf{Q}_t(x_t \neq x_{-1}, y \neq x_t) = \beta(t) \cdot \left(\frac{\lambda}{N}\right) \\
&= \mathbf{Q}_t(x_t, y \neq x_t) \cdot \sum_{y \in \mathcal{X} \setminus \{x_t\}} l_{SE}(x_0, x_{-1}, x_0|u) \\
&\quad e^{\bar{s}_{\Theta}(x_t, t, u)} = \frac{1}{N} \cdot \sum_{y \in \mathcal{X} \setminus \{x_t\}} e^{s_{\Theta}(x_t, t, u)_y} = \frac{1}{N} \cdot \left[ \sum_{y \in \mathcal{X}} e^{s_{\Theta}(x_t, t, u)_y} - 1 \right] \\
&\quad \bar{s}_{\Theta}(x_t, t, u) = \frac{1}{N} \cdot \sum_{y \in \mathcal{X} \setminus \{x_t\}} s_{\Theta}(x_t, t, u)_y = \frac{1}{N} \cdot \sum_{y \in \mathcal{X}} s_{\Theta}(x_t, t, u)_y \\
&\text{if } x_t = x_{-1}, \text{ denote } \Delta = N \cdot \frac{\alpha_t}{1 - \alpha_t} \text{ and } \Lambda = \frac{\lambda \cdot \Delta}{\lambda \cdot \Delta + N} : \\
&= \beta(t) \cdot \left[ N(1 - \lambda) \cdot e^{\bar{s}_{\Theta}(x_t, t, u)} - \lambda \cdot \bar{s}_{\Theta}(x_t, t, u) - \frac{\frac{1}{N} - \lambda}{N} \cdot s_{\Theta}(x_t, t, u)_{x_0} \right] \\
&\quad + \beta(t) \cdot \left\{ \lambda \cdot \left[ 1 + \frac{1}{N} \left( \frac{1}{\Lambda} - 1 \right) \right] \cdot \left[ \log \left( \frac{1}{N} \cdot \frac{\lambda}{1 - \lambda} \right) - 1 \right] - \frac{\log \Lambda}{\Lambda} \right\} \\
&\text{if } x_t = x_0, \text{ denote } \Delta = N \cdot \frac{\alpha_t}{1 - \alpha_t} \text{ and } \Lambda = \frac{\lambda \cdot \Delta}{\lambda \cdot \Delta + N} : \\
&= \beta(t) \cdot \left[ \lambda \cdot e^{\bar{s}_{\Theta}(x_t, t, u)} - \lambda \cdot \Lambda \cdot \bar{s}_{\Theta}(x_t, t, u) - \left( 1 - \lambda - \frac{\lambda}{N} \right) \cdot \Lambda \cdot s_{\Theta}(x_t, t, u)_{x_{-1}} \right] \\
&\quad + \beta(t) \cdot \left\{ \left( 1 - \frac{\lambda}{N} \right) \cdot \Lambda \cdot (\log \Lambda - 1) - \left( 1 - \lambda \right) \cdot \Lambda \cdot \left( \log \left( \frac{1}{N} \frac{\lambda}{1 - \lambda} \right) \right) \right\} \\
&\text{if } x_t \neq \{x_0, x_{-1}\}, \text{ denote } \Delta = N \cdot \frac{\alpha_t}{1 - \alpha_t} \text{ and } \Lambda = \frac{\lambda \cdot \Delta}{\lambda \cdot \Delta + N} : \\
&= \beta(t) \cdot \left[ \lambda \cdot e^{\bar{s}_{\Theta}(x_t, t, u)} - \lambda \cdot \bar{s}_{\Theta}(x_t, t, u) \right] \\
&\quad - \beta(t) \cdot \left[ \left( \frac{1}{N \cdot \Lambda} - \frac{\lambda}{N} \right) \cdot \Lambda \cdot s_{\Theta}(x_t, t, u)_{x_0} + \left( 1 - \lambda - \frac{\lambda}{N} \right) \cdot s_{\Theta}(x_t, t, u)_{x_0} \right] \\
&\quad + \beta(t) \cdot \left\{ \frac{1}{N \cdot \Lambda} \cdot (\log \Lambda + \log \lambda - 1) - (1 - \lambda) \cdot \left( 1 + \log \left( \frac{1}{N} \frac{\lambda}{1 - \lambda} \right) \right) - \left( 1 - \frac{2}{N} \right) \cdot \lambda \right\}.
\end{aligned}$$

#### 107 C.4 Adative Setting

Let  $\vec{p}_T = \vec{\mu} \in \mathbb{R}^N$  or  $\mathbb{R}^{N+1}$ , with  $\sum_{x \in \mathcal{X}} \mu_x = 1$ , we have fading matrix  $\mathbf{E}$  as follows:

$$\mathbf{E} = \begin{pmatrix} \mu_1 & \cdots & \mu_1 \\ \vdots & \ddots & \vdots \\ \mu_{|\mathcal{X}|} & \cdots & \mu_{|\mathcal{X}|} \end{pmatrix}$$

By arbitrarily specifying a distribution  $\vec{\mu}$  satisfying  $\sum_{x \in \mathcal{X}} \mu_x = 1$ , we can instantiate any desired non-preference state, which is physically associated with different negative sampling strategies. In

this case, the reference ratios  $r_t(x_0, x_t \in \mathcal{X}, y \in \mathcal{X})$  are computed as follows:

$$r_t(x_0, x_t, y) = \begin{cases} r_t(x_0, x_t, x_t) = 0 & \text{if } x_t = y \\ r_t(x_0, x_0, y \neq x_0) = -\log\left(\frac{\alpha_t + (1-\alpha_t) \cdot \mu_{x_t}}{(1-\alpha_t) \cdot \mu_y}\right) & \text{if } y \neq x_0 \text{ and } x_t = x_0 \\ r_t(x_0, x_t \neq x_0, x_0) = \log\left(\frac{\alpha_t + (1-\alpha_t) \cdot \mu_{x_t}}{(1-\alpha_t) \cdot \mu_y}\right) & \text{if } y = x_0 \text{ and } x_t \neq x_0 \\ r_t(x_0, x_t \neq x_0, y \neq x_0) = \log\left(\frac{\mu_y}{\mu_{x_t}}\right) & \text{otherwise} \end{cases}$$

$$\mathbf{Q}_t(x, y) = \beta(t) \cdot (\mathbf{E} - \mathbf{I}) = \begin{cases} \beta(t) \left(\frac{1}{N} - 1\right) & \text{if } x = y \\ \beta(t) \cdot \frac{1}{N} & \text{otherwise} \end{cases}$$

We estimate the preference ratios  $\log \frac{p_t(y|u)}{p_t(x_t|u)}$  with  $s_\Theta(x_t, t, u)_y$ :

$$l_{SE}(x_0, x_t, y|u) = e^{s_\Theta(x_t, t, u)_y} - e^{r_t(x_0, x_t, y)} s_\Theta(x_t, t, u)_y + e^{r_t(x_0, x_t, y)} [r_t(x_0, x_t, y) - 1].$$

108 For one user preference data  $(u, x_0)$ , with faded item  $x_t$ , we compute  $\mathcal{L}_{SE}(x_0, x_t, y|u)$ :

$$\begin{aligned} \mathcal{L}_{SE} &= \sum_{y \in \mathcal{X}} \mathbf{Q}_t(x_t, y) \cdot l_{SE}(x_0, x_t, y|u) \\ &= \mathbf{Q}_t(x_t, x_t) \cdot l_{SE}(x_0, x_t, x_t|u) + \sum_{y \in \mathcal{X} \setminus \{x_t\}} \mathbf{Q}_t(x_t, y) \cdot l_{SE}(x_0, x_t, y|u) \\ &\quad s_\Theta(x_t, t, u)_{x_t} = r_t(x_0, x_t, x_t) = 0 \Rightarrow l_{SE}(x_0, x_t, x_t|u) = 0 \\ &= \sum_{y \in \mathcal{X} \setminus \{x_t\}} \mathbf{Q}_t(x_t, y) \cdot l_{SE}(x_0, x_t, y|u) \\ &\quad \mathbf{Q}_t(x_t, y \neq x_t) = \beta(t) \cdot \mu_{x_t} \\ &= \beta(t) \cdot \frac{1}{N} \cdot \sum_{y \in \mathcal{X} \setminus \{x_t\}} l_{SE}(x_0, x_t, y|u) \\ &\quad e^{\tilde{s}_\Theta(x_t, t, u)} = \frac{1}{N} \cdot \sum_{y \in \mathcal{X} \setminus \{x_t\}} e^{s_\Theta(x_t, t, u)_y} = \frac{1}{N} \cdot \left[ \sum_{y \in \mathcal{X}} e^{s_\Theta(x_t, t, u)_y} - 1 \right] \\ &\quad \tilde{s}_\Theta(x_t, t, u) = \sum_{y \in \mathcal{X} \setminus \{x_t\}} \mu_y \cdot s_\Theta(x_t, t, u)_y = \sum_{y \in \mathcal{X}} \mu_y \cdot s_\Theta(x_t, t, u)_y \\ &\quad \hat{\mu} = \sum_{y \in \mathcal{X}} \mu_y \cdot \log \mu_y \end{aligned}$$

if  $x_t = x_0$ , denote  $\Sigma = \frac{\alpha_t}{1 - \alpha_t}$  :

$$\begin{aligned} &= \beta(t) \cdot \left[ \mu_{x_t} \cdot e^{\tilde{s}_\Theta(x_t, t, u)} - \frac{1}{\Sigma + \mu_{x_t}} \cdot \tilde{s}_\Theta(x_t, t, u) \right] \\ &+ \beta(t) \cdot \frac{\mu_{x_t}}{\mu_{x_t} + \Sigma} \cdot [\hat{\mu} + (\mu_{x_t} - 1) \cdot (\log(\mu_{x_t} + \Sigma) - 1) - \mu_{x_t} \cdot \log \mu_{x_t}] \end{aligned}$$

if  $x_t \neq x_0$ , denote  $\Sigma = \frac{\alpha_t}{1 - \alpha_t}$  :

$$\begin{aligned} &= \beta(t) \cdot \left[ \mu_{x_t} \cdot e^{\tilde{s}_\Theta(x_t, t, u)} - \tilde{s}_\Theta(x_t, t, u) - \Sigma \cdot s_\Theta(x_t, t, u)_{x_0} \right] \\ &+ \beta(t) \cdot [\hat{\mu} + \mu_{x_t} - (1 + \Sigma)(1 + \log(\mu_{x_t})) + (\Sigma + \mu_{x_0}) \log(\Sigma + \mu_{x_0}) - (\mu_{x_0}) \cdot \log(\mu_{x_0})]. \end{aligned}$$

## 109 D Broader Impacts

110 Theoretically, PreferGrow introduces a well-defined discrete diffusion model building upon prior  
111 work. While designed for recommendation, PreferGrow is also applicable to other discrete domains,  
112 such as molecular design in chemistry and protein structure prediction. There are many potential  
113 societal consequences of our work, none of which we believe warrant specific attention at this time.

## 114 E Algorithms for Training and Inference

---

### Algorithm 1 Training Algorithm of PreferGrow

---

**Input:** user preference data  $\mathcal{D} = \{(u, x_0)\}$ , non-preference user ratio  $p$ , retention probability  $\alpha_t = e^{-\int_0^t \beta(\tau) d\tau}$  with  $\int_0^t \beta(\tau) d\tau = (\beta_{\min})^{1-t}(\beta_{\max})^t$  or  $\int_0^t \beta(\tau) d\tau = \log(1 - (1 - \beta_{\text{scale}} \cdot t))$ , and the non-preference state  $\vec{p}_T$  for preference fading.  
**Output:** estimated *Preference Ratios*  $\mathbf{s}_\Theta(x_t, t, u)$  and the non-preference user  $\phi$ .

115 **repeat**  
      $(u, x_0) \sim \mathcal{D}$  ▷ preference user-item pair.  
      $t \sim \text{Uniform}(\{1, \dots, T\})$  ▷ sampling timestep  $t$  uniformly.  
      $u = \phi$  with probability  $p$  ▷ non-preference user modeling.  
      $x_t \sim p_{t|0}(\cdot|x_0) = \alpha_t \vec{e}_{x_0} + (1 - \alpha_t) \vec{p}_T, x_t \in \mathcal{X}$  ▷ retain or replace for preference fading.  
     Compute the score entropy loss  $\mathcal{L}_{SE} = \sum_{y \in \mathcal{X}} \mathbf{Q}_t(x_t, y) \cdot l_{SE}(x_0, x_t, y|u)$  as Appendix C.  
     Take gradient descent step on  $\nabla_\theta \mathcal{L}_{SE}$  and update parameters.  
**until** converged

---

### Algorithm 2 Inference Algorithm of PreferGrow

---

**Input:** user condition  $u$ , sampling timesteps  $S_\tau = \{\tau_i\}_{i=0}^S$  with  $\tau_S = T$  and  $\tau_0 = 0$ , personalization strength  $w$ , estimated *Preference Ratios*  $\mathbf{s}_\Theta(x_t, t, u)$  and the non-preference user  $\phi$ .  
**Output:** grown preference scores  $p(x_0|u), x_0 \in \mathcal{X}$  of user  $u$ . ▷ the non-preference state.

$x_T = x_{\tau_S} \sim \vec{p}_T, x_T \in \mathcal{X}$  ▷ the non-preference state.  
**for**  $s = S$  to 1 **do**  
      $\hat{\mathbf{s}}_\Theta(x_{\tau_s}, \tau_s, u) = (1 + w) \mathbf{s}_\Theta(x_{\tau_s}, \tau_s, u) - w \cdot \mathbf{s}_\Theta(x_{\tau_s}, \tau_s, \phi)$  ▷ personalization enhancement.  
      $p_{\tau_{s-1}|\tau_s}(x_{\tau_{s-1}}|x_{\tau_s}, u) = p_{\tau_s|\tau_{s-1}}(x_{\tau_s}|x_{\tau_{s-1}}) \cdot \sum_{z \in \mathcal{X}} p_{\tau_s|\tau_{s-1}}^{-1}(x_{\tau_{s-1}}|z) \cdot e^{\hat{\mathbf{s}}_\Theta(x_{\tau_s}, \tau_s, u)_z}$   
     116  $\triangleright p_{\tau_s|\tau_{s-1}}(x_{\tau_s}|x_{\tau_{s-1}}) = \frac{\alpha_{\tau_s}}{\alpha_{\tau_{s-1}}} \delta_{x_{\tau_s}}(x_{\tau_{s-1}}) + (1 - \frac{\alpha_{\tau_s}}{\alpha_{\tau_{s-1}}}) \cdot \vec{p}_T(x_{\tau_s})$  as Equation (??).  
      $\triangleright p_{\tau_{s-1}|\tau_s}^{-1}(x_{\tau_{s-1}}|z) = \frac{\alpha_{\tau_{s-1}}}{\alpha_{\tau_s}} \delta_{x_{\tau_{s-1}}}(z) + (1 - \frac{\alpha_{\tau_{s-1}}}{\alpha_{\tau_s}}) \cdot \vec{p}_T(x_{\tau_{s-1}})$  as Equation (??).  
      $\triangleright \sum_{z \in \mathcal{X}} p_{\tau_s|\tau_{s-1}}^{-1}(x_{\tau_{s-1}}|z) \cdot e^{\hat{\mathbf{s}}_\Theta(x_{\tau_s}, \tau_s, u)_z} = \frac{\alpha_{\tau_{s-1}}}{\alpha_{\tau_s}} e^{\hat{\mathbf{s}}_\Theta(x_{\tau_s}, \tau_s, u)_{x_{\tau_{s-1}}}}$   
      $+ (1 - \frac{\alpha_{\tau_{s-1}}}{\alpha_{\tau_s}}) \cdot \vec{p}_T(x_{\tau_{s-1}}) \cdot \sum_{z \in \mathcal{X}} e^{\hat{\mathbf{s}}_\Theta(x_{\tau_s}, \tau_s, u)_z}.$   
      $x_{\tau_{s-1}} \sim p_{\tau_{s-1}|\tau_s}(x_{\tau_{s-1}}|x_{\tau_s}, u), x_{\tau_{s-1}} \in \mathcal{X}$ . ▷ reverse preference growing.  
**end for**  
**return**  $p(x_0|u) = p_{\tau_0|\tau_1}(x_{\tau_0}|x_{\tau_1}, u), x_0 \in \mathcal{X}$  ▷ grown preference scores of user  $u$ .

---

## 117 F Experiments Details

### 118 F.1 Datasets

119 We evaluate PreferGrow on five real-world benchmark datasets:

- 120 • **MoviesLens** [41] is a commonly used movie recommendation dataset that contains user ratings,  
 121 movie titles, and movie genres.
- 122 • **Steam** [42] encompasses user reviews for video games on the Steam Store.
- 123 • **Beauty** [43] contains movie details and user reviews from Jun 1996 to Sep 2023.
- 124 • **Toys** [43] includes user reviews and metadata for toys and games from Jun 1996 to Jul 2014.
- 125 • **Sports** [43] comprises reviews and metadata for sports and outdoor products from 1996 to 2014.

126 Following prior works [1, 2], we adopt the user-splitting strategy, which has been shown to effectively  
 127 prevent information leakage in test sets [44]. Specifically, we sort all sequences chronologically for  
 128 each dataset and then split the data into training, validation, and test sets with an 8:1:1 ratio, while  
 129 preserving the last 10 interactions as the historical sequence. The statistical characteristics of the  
 130 processed dataset are shown in Table 2. As observed from the table, the recommendation datasets  
 131 face a significant challenge of severe data sparsity.

Table 2: Statistics of datasets after preprocessing.

| Dataset | # users | # items | # Interactions | sparsity |
|---------|---------|---------|----------------|----------|
| Movies  | 6040    | 3883    | 1001456        | 04.27%   |
| Steam   | 39795   | 9265    | 2949605        | 00.80%   |
| Beauty  | 22,363  | 12,101  | 198,502        | 00.07%   |
| Toys    | 19,412  | 11,924  | 138,444        | 00.06%   |
| Sports  | 35,598  | 18,357  | 256,598        | 00.04%   |

## F.2 Baselines

We compare PreferGrow with both traditional discriminative recommenders using negative sampling and diffusion-based generative recommenders, including classical recommenders (SASRec [42], Caser [45], GRURec [46]), item-level diffusion-based recommenders (DreamRec [1], PreferDiff [2]), and preference score-level diffusion-based recommenders (DiffRec [3], DDSR [5]):

- **SASRec** [42] leverages the self-attention mechanism in Transformer to model user preference scores from interaction histories, addressing data sparsity through negative sampling.
- **Caser** [45] utilizes horizontal and vertical convolutional filters to capture sequential patterns at the point-level and union-level, allowing for skip behaviors, and models user preference scores while addressing data sparsity through negative sampling.
- **GRURec** [46] adopts RNNs to model user preference scores from interaction histories, mitigating data sparsity through negative sampling.
- **DreamRec** [1] reshapes sequential recommendation as oracle item generation, addressing data sparsity by adding Gaussian noise to dense item embeddings.
- **PreferDiff** [2] introduces an optimization objective specifically designed for item-level DM-based recommenders, which can integrate multiple negative samples, addressing data sparsity by adding noise to dense item embeddings and using negative sampling both.
- **DiffRec** [3] is a preference score-level diffusion-based generative recommender assuming a Gaussian prior, addressing data sparsity by adding Gaussian noise to preference scores, without considering the constraints of the probability simplex.
- **DDSR** [5] is a preference score-level diffusion-based generative recommender assuming a categorical prior, addressing data sparsity by adding discrete noise to preference scores while respecting the constraints of the probability simplex.

## F.3 Implementation Details

**Training settings:** We implement all models using Python 3.7 and PyTorch 1.12.1 on an Nvidia GeForce RTX 3090. During training, all methods are trained with a fixed batch size of 256 using the Adam optimizer. Additionally, we apply early stopping based on the model’s performance on the validation set.

To ensure reproducibility, we fix all random seeds to 100, a randomly chosen value. For the classic recommenders with negative sampling, we employ the binary cross-entropy (BCE) loss. PreferGrow uses SASRec as the encoding model for the user’s historical sequence, and we adopt both Hybrid-Wise and Adaptive settings for the fading matrix. For all SASRec modules, we apply RoPE position encoding [47]. The search space of hyperparameters for the baselines is shown in Table 3, and the optimal parameters for our PreferGrow under both hybrid and adaptive settings are presented in Table 4.

**Evaluation Protocols and Metrics:** To ensure a comprehensive evaluation and mitigate potential biases, we adopt the all-rank protocol [48–50, 1, 2], which evaluates recommendations across all items. We employ two widely used ranking-based metrics: *Normalized Discounted Cumulative Gain* ( $N@K$ ) and *Mean Reciprocal Rank* ( $M@K$ ), to assess the effectiveness of the models.

Table 3: Hyperparameters Search Space for Baselines.

| Method     | Hyperparameter Search Space                                                                                                                                                          |
|------------|--------------------------------------------------------------------------------------------------------------------------------------------------------------------------------------|
| Shared     | lr $\sim \{1e-2, 1e-3, 1e-4, 1e-5\}$ with decay 0, embedding size $d \sim \{128, 256, 512\}$<br>the number of negative sampling (if using) $\sim \{64, 128, 256\}$ , bath size = 256 |
| DreamRec   | $w \sim \{0, 1, 2, 5, 10\}$ , $T \sim \{500, 1000, 2000, 3000\}$ , $p \sim \{0.05, 0.1, 0.15, 0.2, 0.25, 0.3\}$                                                                      |
| PreferDiff | $\lambda \sim \{0.2, 0.4, 0.6, 0.8\}$ , $w \sim \{0, 1, 2, 5, 10\}$ , $T \sim \{500, 1000, 2000, 3000\}$                                                                             |
| DiffRec    | noise scale $\sim \{1e-1, 1e-2, 1e-3, 1e-4, 1e-5\}$ , $T \sim \{2, 5, 20, 50, 100\}$                                                                                                 |
| DDSR       | $T \sim \{500, 1000, 2000, 3000\}$                                                                                                                                                   |
| PreferGrow | $T \sim \{5, 10, 20, 30, 40\}$ , $p \sim \{0.05, 0.1, 0.15, 0.2, 0.25, 0.3\}$<br>$w \sim \{0, 1, 2, 5, 10\}$ , $\lambda \sim \{0.9, 0.99, 0.999, 0.9999, 0.99999\}$                  |

Table 4: Best Hyperparameters for PreferGrow on five dataset.

| Variant  | Dataset   | lr   | $d$ | $p$  | $T$ | $w$ | $\lambda$ |
|----------|-----------|------|-----|------|-----|-----|-----------|
| Hybrid   | MovieLens | 1e-4 | 256 | 0.1  | 20  | 10  | 0.9999    |
|          | Steam     | 1e-3 | 256 | 0.1  | 20  | 10  | 0.99999   |
|          | Beauty    | 1e-4 | 256 | 0.1  | 20  | 5   | 0.999     |
|          | Toys      | 1e-3 | 256 | 0.2  | 20  | 10  | 0.9999    |
|          | Sports    | 1e-3 | 256 | 0.2  | 20  | 1   | 0.9999    |
| Variant  | Method    | lr   | $d$ | $p$  | $T$ | $w$ | $x_{-1}$  |
| Adaptive | Dataset   | 1e-4 | 256 | 0.2  | 20  | 10  | True      |
|          | Steam     | 1e-3 | 256 | 0.05 | 20  | 10  | True      |
|          | Beauty    | 1e-4 | 256 | 0.1  | 20  | 2   | True      |
|          | Toys      | 1e-4 | 256 | 0.2  | 20  | 5   | True      |
|          | Sports    | 1e-4 | 256 | 0.2  | 20  | 5   | True      |

Table 5: Comparison of efficiency on Steam.

| Models     | # Trainable Parameters | # training epochs | Inference GFLOPs | Inference steps |
|------------|------------------------|-------------------|------------------|-----------------|
| SASRec     | 2.70M                  | 61                | 0.85             | 1               |
| Caser      | 2.49M                  | 58                | 0.38             | 1               |
| GRURec     | 2.77M                  | 55                | 4.06             | 1               |
| DreamRec   | 7.25M                  | 52                | 0.85             | 20              |
| PreferDiff | 7.25M                  | 55                | 0.85             | 20              |
| DiffRec    | 18.55M                 | 1000              | /                | 20              |
| DDSR       | 3.03M                  | 142               | 1.77             | 20              |
| PreferGrow | 3.03M                  | 480               | 0.93             | 20              |

#### F.4 Efficiency Analysis

As shown in Table 5, we present the trainable parameters of each model, the number of training epochs, the GFLOPS per model output (note that diffusion models require multiple outputs for denoising), and the number of model outputs.

## References

- [1] Zhengyi Yang, Jiancan Wu, Zhicai Wang, Xiang Wang, Yancheng Yuan, and Xiangnan He. Generate what you prefer: Reshaping sequential recommendation via guided diffusion. In *NeurIPS*, 2023.
- [2] Shuo Liu, An Zhang, Guoqing Hu, Hong Qian, and Tat seng Chua. Preference diffusion for recommendation. In *ICLR*, 2025.
- [3] Wenjie Wang, Yiyang Xu, Fuli Feng, Xinyu Lin, Xiangnan He, and Tat-Seng Chua. Diffusion recommender model. In *SIGIR*, 2023.
- [4] Jiacheng Li, Ming Wang, Jin Li, Jinmiao Fu, Xin Shen, Jingbo Shang, and Julian McAuley. Text is all you need: Learning language representations for sequential recommendation. In *KDD*, pages 1258–1267, 2023.
- [5] Wenjia Xie, Hao Wang, Luankang Zhang, Rui Zhou, Defu Lian, and Enhong Chen. Breaking determinism: Fuzzy modeling of sequential recommendation using discrete state space diffusion model. *NeurIPS*, 2024.
- [6] Zihao Li, Aixin Sun, and Chenliang Li. Diffurec: A diffusion model for sequential recommendation. *TOIS*, 2023.
- [7] Hanwen Du, Huanhuan Yuan, Zhen Huang, Pengpeng Zhao, and Xiaofang Zhou. Sequential recommendation with diffusion models. *arXiv*, 2023.
- [8] Yu Wang, Zhiwei Liu, Liangwei Yang, and Philip S Yu. Conditional denoising diffusion for sequential recommendation. In *PAKDD*, 2024.
- [9] Qidong Liu, Fan Yan, Xiangyu Zhao, Zhaocheng Du, Huifeng Guo, Ruiming Tang, and Feng Tian. Diffusion augmentation for sequential recommendation. In *CIKM*, 2023.
- [10] Jujia Zhao, Wang Wenjie, Yiyang Xu, Teng Sun, Fuli Feng, and Tat-Seng Chua. Denoising diffusion recommender model. In *SIGIR*, 2024.
- [11] Yuner Xuan. Diffusion cross-domain recommendation. *arXiv*, 2024.
- [12] Zixuan Yi, Xi Wang, and Iadh Ounis. A directional diffusion graph transformer for recommendation. *arXiv*, 2024.
- [13] Yu Hou, Jin-Duk Park, and Won-Yong Shin. Collaborative filtering based on diffusion models: Unveiling the potential of high-order connectivity. In *SIGIR*, 2024.
- [14] Ziqiang Cui, Haolun Wu, Bowei He, Ji Cheng, and Chen Ma. Context matters: Enhancing sequential recommendation with context-aware diffusion-based contrastive learning. In *CIKM*, 2024.
- [15] Federico Tomasi, Francesco Fabbri, Mounia Lalmas, and Zhenwen Dai. Diffusion model for slate recommendation. *arXiv*, 2024.
- [16] Fan Huang and Wei Wang. Diffusion-augmented graph contrastive learning for collaborative filter. *arXiv*, 2025.
- [17] Xiaodong Li, Hengzhu Tang, Jiawei Sheng, Xinghua Zhang, Li Gao, Suqi Cheng, Dawei Yin, and Tingwen Liu. Exploring preference-guided diffusion model for cross-domain recommendation. *arXiv*, 2025.
- [18] Jin Li, Shoujin Wang, Qi Zhang, Shui Yu, and Fang Chen. Generating with fairness: A modality-diffused counterfactual framework for incomplete multimodal recommendations. *arXiv*, 2025.
- [19] Wenyu Mao, Shuchang Liu, Haoyang Liu, Haozhe Liu, Xiang Li, and Lantao Hu. Distinguished quantized guidance for diffusion-based sequence recommendation. *WWW*, 2025.
- [20] Chu Zhao, Enneng Yang, Yuliang Liang, Jianzhe Zhao, Guibing Guo, and Xingwei Wang. Distributionally robust graph out-of-distribution recommendation via diffusion model. *arXiv*, 2025.

- [21] Sharare Zolghadr, Ole Winther, and Paul Jeha. Generative diffusion models for sequential recommendations. *arXiv*, 2024.
- [22] Guoqing Hu, Zhengyi Yang, Zhibo Cai, An Zhang, and Xiang Wang. Generate and instantiate what you prefer: Text-guided diffusion for sequential recommendation. In *arXiv*, 2024.
- [23] Gabriel Bénédict, Olivier Jeunen, Samuele Papa, Samarth Bhargav, Daan Odijk, and Maarten de Rijke. Recfusion: A binomial diffusion process for 1d data for recommendation. *arXiv*, 2023.
- [24] Penghang Yu, Zhiyi Tan, Guanming Lu, and Bing-Kun Bao. Ld4mrec: Simplifying and powering diffusion model for multimedia recommendation. *arXiv*, 2023.
- [25] Haokai Ma, Ruobing Xie, Lei Meng, Xin Chen, Xu Zhang, Leyu Lin, and Zhanhui Kang. Plug-in diffusion model for sequential recommendation. In *AAAI*, 2024.
- [26] Utkarsh Priyam, Hemit Shah, and Edoardo Botta. Edge-rec: Efficient and data-guided edge diffusion for recommender systems graphs. *arXiv*, 2024.
- [27] Zhenhao Jiang and Jicong Fan. Diffairec: Generative fair recommender with conditional diffusion model. *arXiv*, 2024.
- [28] Gwangseok Han, Wonbin Kweon, Minsoo Kim, and Hwanjo Yu. Controlling diversity at inference: Guiding diffusion recommender models with targeted category preferences. *arXiv preprint arXiv:2411.11240*, 2024.
- [29] Yangqin Jiang, Lianghao Xia, Wei Wei, Da Luo, Kangyi Lin, and Chao Huang. Diffmm: Multi-modal diffusion model for recommendation. In *MM*, 2024.
- [30] Rui Xia, Yanhua Cheng, Yongxiang Tang, Xiaocheng Liu, Xialong Liu, Lisong Wang, and Peng Jiang. S-diff: An anisotropic diffusion model for collaborative filtering in spectral domain. In *WSDM*, 2025.
- [31] Yang Song and Stefano Ermon. Generative modeling by estimating gradients of the data distribution. *NeurIPS*, 2019.
- [32] Steffen Rendle, Christoph Freudenthaler, Zeno Gantner, and Lars Schmidt-Thieme. Bpr: Bayesian personalized ranking from implicit feedback. *UAI*, 2009.
- [33] Wuchao Li, Rui Huang, Haijun Zhao, Chi Liu, Kai Zheng, Qi Liu, Na Mou, Guorui Zhou, Defu Lian, Yang Song, et al. Dimerec: A unified framework for enhanced sequential recommendation via generative diffusion models. In *WSDM*, 2025.
- [34] Aaron Lou, Chenlin Meng, and Stefano Ermon. Discrete diffusion modeling by estimating the ratios of the data distribution. *ICML*, 2024.
- [35] Jacob Austin, Daniel D Johnson, Jonathan Ho, Daniel Tarlow, and Rianne Van Den Berg. Structured denoising diffusion models in discrete state-spaces. *NeurIPS*, 2021.
- [36] Andrew Campbell, Joe Benton, Valentin De Bortoli, Thomas Rainforth, George Deligiannidis, and Arnaud Doucet. A continuous time framework for discrete denoising models. *NeurIPS*, 2022.
- [37] Chenlin Meng, Kristy Choi, Jiaming Song, and Stefano Ermon. Concrete score matching: Generalized score matching for discrete data. *NeurIPS*, 2022.
- [38] Haoran Sun, Lijun Yu, Bo Dai, Dale Schuurmans, and Hanjun Dai. Score-based continuous-time discrete diffusion models. *ICLR*, 2023.
- [39] Jingyang Ou, Shen Nie, Kaiwen Xue, Fengqi Zhu, Jiacheng Sun, Zhenguo Li, and Chongxuan Li. Your absorbing discrete diffusion secretly models the conditional distributions of clean data. *ICLR*, 2025.



- 265 [40] Andrew Campbell, Jason Yim, Regina Barzilay, Tom Rainforth, and Tommi Jaakkola. Gen-  
266 erative flows on discrete state-spaces: enabling multimodal flows with applications to protein  
267 co-design. In *ICML*, 2024.
- 268 [41] F. Maxwell Harper and Joseph A. Konstan. The movielens datasets: History and context. *ACM*  
269 *Trans. Interact. Intell. Syst.*, 2016.
- 270 [42] Wang-Cheng Kang and Julian J. McAuley. Self-attentive sequential recommendation. In *ICDM*,  
271 2018.
- 272 [43] Julian J. McAuley, Christopher Targett, Qinfeng Shi, and Anton van den Hengel. Image-based  
273 recommendations on styles and substitutes. In *SIGIR*, 2015.
- 274 [44] Yitong Ji, Aixin Sun, Jie Zhang, and Chenliang Li. A critical study on data leakage in  
275 recommender system offline evaluation. *TOIS*, 2023.
- 276 [45] Jiaxi Tang and Ke Wang. Personalized top-n sequential recommendation via convolutional  
277 sequence embedding. In *WSDM*, pages 565–573. ACM, 2018.
- 278 [46] Balázs Hidasi, Alexandros Karatzoglou, Linas Baltrunas, and Domonkos Tikk. Session-based  
279 recommendations with recurrent neural networks. In *ICLR (Poster)*, 2016.
- 280 [47] Jianlin Su, Murtadha Ahmed, Yu Lu, Shengfeng Pan, Wen Bo, and Yunfeng Liu. Roformer:  
281 Enhanced transformer with rotary position embedding. *Neurocomputing*, 2024.
- 282 [48] Xiangnan He, Kuan Deng, Xiang Wang, Yan Li, Yong-Dong Zhang, and Meng Wang. Lightgcn:  
283 Simplifying and powering graph convolution network for recommendation. In *SIGIR*, 2020.
- 284 [49] Jiancan Wu, Xiang Wang, Fuli Feng, Xiangnan He, Liang Chen, Jianxun Lian, and Xing Xie.  
285 Self-supervised graph learning for recommendation. *SIGIR*, 2021.
- 286 [50] Xubin Ren, Wei Wei, Lianghao Xia, Lixin Su, Suqi Cheng, Junfeng Wang, Dawei Yin, and  
287 Chao Huang. Representation learning with large language models for recommendation. In  
288 *WWW*, 2024.
